# Supplementary material
Source: Research Square preprint supplement (doi:10.21203/rs.3.rs-9422000/v1)
Supplement: Supplementary file 1 [file a7fddefd793a11d75e37517a.docx]

**APPENDIX A: OBSERVATION CHECKLIST**

**PART A: Pre-Observation Interview Guide**

Procedure: Conducted a day or two before the scheduled observation.

Goal: To understand the teacher's preparation, collaboration, and rationale for their digital pedagogy choices.

**1. Professional Engagement & Planning (Aspects 1.1, 1.2)**

- "In preparing for this lesson, did you collaborate with any other teachers or ICT staff? If so, how did that shape your plan?"
- "Are there any specific digital pedagogy skills you have been working on developing lately that I might see in action today?"

**2. Digital Resources (Aspects 2.1, 2.2)**

- "Can you walk me through the digital resources and platforms you’ve selected for this lesson? Why did you choose these specific tools over others?"
- "Did you need to create or heavily modify any of these digital materials yourself to fit your students' needs?"

**3. Differentiated Learning & Access (Aspects 3.4, 4.1, 4.2)**

- "How are the digital tools you are using today helping to personalize or differentiate the learning for students at different levels?"
- "Do you anticipate any access issues (e.g., internet connectivity, lack of devices) for any students, and what is your backup plan if technology fails?"

**4. Assessment Strategy (Aspect 5.1)**

- "How do you plan to use technology to assess student understanding during this lesson?"

**PART B: Observation Checklist**

Procedure: During the classroom observation, mark whether each behavior is *Observed (O)*, *Not Observed (NO)*, or *Not Applicable (N/A)* for this specific lesson. Use the *Evidence/Notes (R/N)* column to record specific examples, tool names, or timestamps.

**Classroom Observation Checklist**

**Teacher Name:** _______________ **Observer:** _______________ **Date:** _______ **Subject/Grade:** _______________ **Lesson Topic:** ___________________________

**Part 1: Professional Engagement *(Note: May require pre/post-lesson verification)***

| Code | Observable Behavior | O | NO | N/A | R/N |
| --- | --- | --- | --- | --- | --- |
| 1.1 | *Pre/Post-lesson:* Lesson plan shows evidence of co-planning or alignment with colleagues regarding digital tools. | ◯ | ◯ | ◯ |  |
| 1.2 | Teacher effectively utilizes available technical support or pre-planned tech infrastructure without disrupting the flow. | ◯ | ◯ | ◯ |  |
| 1.3 | Teacher adapts the digital lesson in real-time based on what is or isn't working (in-the-moment reflection). | ◯ | ◯ | ◯ |  |
| 1.4 | Teacher demonstrates familiarity and competence with the digital tools being used, indicating ongoing learning. | ◯ | ◯ | ◯ |  |

**Part 2: Digital Resources**

| Code | Observable Behavior | O | NO | N/A | R/N |
| --- | --- | --- | --- | --- | --- |
| 2.1 | The digital resources (apps, websites, media) chosen are directly aligned with the lesson's learning objectives. | ◯ | ◯ | ◯ |  |
| 2.2 | Teacher uses customized or modified digital materials (not just generic, out-of-the-box publisher content). | ◯ | ◯ | ◯ |  |
| 2.3 | Teacher seamlessly navigates to resources, shares secure links quickly, and maintains student data privacy. | ◯ | ◯ | ◯ |  |

**Part 3: Teaching and Learning**

| Code | Observable Behavior | O | NO | N/A | R/N |
| --- | --- | --- | --- | --- | --- |
| 3.1 | Teacher fluently models how to use the relevant digital applications for the students. | ◯ | ◯ | ◯ |  |
| 3.2 | Teacher provides clear, step-by-step guidance on where to find and how to access the required digital resources. | ◯ | ◯ | ◯ |  |
| 3.3 | Teacher uses digital platforms (e.g., shared docs, breakout rooms, digital whiteboards) to facilitate student collaboration. | ◯ | ◯ | ◯ |  |
| 3.4 | Teacher utilizes technology to allow for different learning speeds or paths (e.g., varied digital tasks, self-paced modules). | ◯ | ◯ | ◯ |  |

**Part 4: Empowering Students**

| Code | Observable Behavior | O | NO | N/A | R/N |
| --- | --- | --- | --- | --- | --- |
| 4.1 | Teacher checks that all students have working access to devices/internet and provides alternatives if tech fails. | ◯ | ◯ | ◯ |  |
| 4.2 | Students are provided with digital materials that offer varied ways to learn (e.g., audio options, visual aids, leveled text). | ◯ | ◯ | ◯ |  |
| 4.3 | Students are actively using technology to interact with the lesson (e.g., digital polling, interactive Q&A) rather than passively watching a screen. | ◯ | ◯ | ◯ |  |

**Part 5: Assessment**

| Code | Observable Behavior | O | NO | N/A | R/N |
| --- | --- | --- | --- | --- | --- |
| 5.1 | Teacher uses digital tools for formative or summative assessment (e.g., quizzes, exit tickets, digital portfolios) during the lesson. | ◯ | ◯ | ◯ |  |
| 5.2 | Teacher actively monitors a digital dashboard or real-time results to gauge class-wide understanding. | ◯ | ◯ | ◯ |  |
| 5.3 | Teacher provides immediate digital feedback or pauses/adjusts the lesson based on real-time digital assessment data. | ◯ | ◯ | ◯ |  |

**Part 6: Facilitating Students' Digital Competence**

| Code | Observable Behavior | O | NO | N/A | R/N |
| --- | --- | --- | --- | --- | --- |
| 6.1 | Teacher prompts students to evaluate the credibility or source of digital information during the lesson. | ◯ | ◯ | ◯ |  |
| 6.2 | Teacher models and enforces positive digital etiquette (netiquette) in online chats, forums, or collaborative spaces. | ◯ | ◯ | ◯ |  |
| 6.3 | Students are tasked with creating digital content (e.g., a slide, a video, a digital design) rather than just consuming it. | ◯ | ◯ | ◯ |  |
| 6.4 | Teacher explicitly addresses digital safety, copyright, or the ethical use of tools (e.g., citing sources, AI use) during the activity. | ◯ | ◯ | ◯ |  |
| 6.5 | Teacher encourages students to troubleshoot their own minor tech issues or use digital tools to solve complex academic problems. | ◯ | ◯ | ◯ |  |

**PART C: Post-Observation Interview Guide**

Procedure: To be conducted shortly after the observation.

Goal: To encourage self-reflection, discuss the evidence of learning, and identify areas for future growth.

**1. Self-Reflection & Professional Engagement (Aspects 1.3, 1.4)**

- "Reflecting on the lesson, how do you feel the interactive hybrid elements worked? Did the technology enhance the learning the way you hoped?"
- "Based on how today went, is there a specific digital skill or tool you’d like to learn more about or develop further?"

**2. Analyzing Learning & Assessment (Aspects 5.2, 5.3)**

- "Let’s look at the data or evidence you gathered from the digital assessments today (e.g., quiz scores, digital exit tickets). What does it tell you about the students' understanding?"
- "How will you use this digital feedback to plan your next lesson for this class?"

**3. Empowering Students & Collaboration (Aspects 3.3, 4.3)**

- "How engaged do you think the students were with the digital materials? Were there any students who struggled to interact, and how did you manage that?"
- "Do you feel the digital tools effectively supported student-to-student collaboration today?"

**4. Facilitating Students' Digital Competence (Aspects 6.4, 6.5)**

- "Did any spontaneous moments arise where you had to guide students on digital etiquette, problem-solving a tech issue, or using resources responsibly?"
- "Looking ahead, how might you challenge these students to shift from *consuming* digital content to *creating* their own content in future lessons?"

**Thank you**

**APPENDIX B: LECTURER QUESTIONNAIRE**

Below is a structured 5-point Likert scale questionnaire measuring teacher's digital pedagogic competence and interactive hybrid learning. Please read each statement carefully and rate your level of agreement based on your current teaching practices. Select the number that best represents your self-assessment.

**Scale:**

**1** = Strongly Disagree

**2** = Disagree

**3** = Neutral

**4** = Agree

**5** = Strongly Agree

**Part 1: Professional Engagement**

| **No.** | **Statement** | **1** | **2** | **3** | **4** | **5** |
| --- | --- | --- | --- | --- | --- | --- |
| 1.1 | I actively maintain communication with colleagues at the school level regarding digital pedagogy. | ◯ | ◯ | ◯ | ◯ | ◯ |
| 1.2 | I regularly collaborate with ICT lecturers, experts, and staff to improve my teaching. | ◯ | ◯ | ◯ | ◯ | ◯ |
| 1.3 | I consistently reflect on my own and others' interactive hybrid learning practices. | ◯ | ◯ | ◯ | ◯ | ◯ |
| 1.4 | I continuously seek opportunities to develop my personal digital pedagogic competence. | ◯ | ◯ | ◯ | ◯ | ◯ |

**Part 2: Digital Resources**

| **No.** | **Statement** | **1** | **2** | **3** | **4** | **5** |
| --- | --- | --- | --- | --- | --- | --- |
| 2.1 | I can effectively select appropriate resources for interactive hybrid learning. | ◯ | ◯ | ◯ | ◯ | ◯ |
| 2.2 | I am capable of creating and modifying my own interactive hybrid learning resources. | ◯ | ◯ | ◯ | ◯ | ◯ |
| 2.3 | I systematically manage, protect, and share interactive hybrid learning resources with others. | ◯ | ◯ | ◯ | ◯ | ◯ |

**Part 3: Teaching and Learning**

| **No.** | **Statement** | **1** | **2** | **3** | **4** | **5** |
| --- | --- | --- | --- | --- | --- | --- |
| 3.1 | I teach students using highly relevant digital resources and applications. | ◯ | ◯ | ◯ | ◯ | ◯ |
| 3.2 | I effectively guide students toward appropriate digital resources and applications for their needs. | ◯ | ◯ | ◯ | ◯ | ◯ |
| 3.3 | I successfully collaborate with students within an interactive hybrid learning environment. | ◯ | ◯ | ◯ | ◯ | ◯ |
| 3.4 | I regulate learning to provide digitally differentiated, personalized, and interactive experiences. | ◯ | ◯ | ◯ | ◯ | ◯ |

**Part 4: Empowering Students**

| **No.** | **Statement** | **1** | **2** | **3** | **4** | **5** |
| --- | --- | --- | --- | --- | --- | --- |
| 4.1 | I ensure all my students have equal access and inclusion to digital resources and learning. | ◯ | ◯ | ◯ | ◯ | ◯ |
| 4.2 | I provide differentiated, personalized, and interactive digital learning materials for my students. | ◯ | ◯ | ◯ | ◯ | ◯ |
| 4.3 | I actively and successfully engage students in interactive hybrid learning activities. | ◯ | ◯ | ◯ | ◯ | ◯ |

**Part 5: Assessment**

| **No.** | **Statement** | **1** | **2** | **3** | **4** | **5** |
| --- | --- | --- | --- | --- | --- | --- |
| 5.1 | I use a variety of digital assessment strategies within interactive hybrid learning environments. | ◯ | ◯ | ◯ | ◯ | ◯ |
| 5.2 | I systematically analyze evidence of student learning gathered through interactive hybrid learning. | ◯ | ◯ | ◯ | ◯ | ◯ |
| 5.3 | I use digital assessment data to provide feedback and plan for future interactive hybrid learning. | ◯ | ◯ | ◯ | ◯ | ◯ |

**Part 6: Facilitating Students' Digital Competence**

| **No.** | **Statement** | **1** | **2** | **3** | **4** | **5** |
| --- | --- | --- | --- | --- | --- | --- |
| 6.1 | I actively facilitate the development of my students' information and media literacy. | ◯ | ◯ | ◯ | ◯ | ◯ |
| 6.2 | I support students in maintaining proper communication in and out of interactive hybrid learning contexts. | ◯ | ◯ | ◯ | ◯ | ◯ |
| 6.3 | I encourage and guide learners to create their own content for interactive hybrid learning. | ◯ | ◯ | ◯ | ◯ | ◯ |
| 6.4 | I educate and facilitate my students on the responsible and ethical use of digital resources. | ◯ | ◯ | ◯ | ◯ | ◯ |
| 6.5 | I facilitate and encourage students to solve problems using digital tools in hybrid learning contexts. | ◯ | ◯ | ◯ | ◯ | ◯ |

**Thank you**

**APPENDIX D: STUDENT QUESTIONNAIRE**

Below is a questionnaire designed for students to evaluate teacher's digital pedagogic competence. Please read each statement carefully and think about your experiences with your teacher in this class. Rate your level of agreement by selecting the number that best matches your opinion.

**Scale:**

**1** = Strongly Disagree

**2** = Disagree

**3** = Neutral

**4** = Agree

**5** = Strongly Agree

**Part 1: Professional Engagement**

| **No.** | **Statement** | **1** | **2** | **3** | **4** | **5** |
| --- | --- | --- | --- | --- | --- | --- |
| 1.1 | My teacher seems to coordinate well with other teachers to make our digital learning smooth. | ◯ | ◯ | ◯ | ◯ | ◯ |
| 1.2 | My teacher is able to get help from IT staff or use technical support when things go wrong in class. | ◯ | ◯ | ◯ | ◯ | ◯ |
| 1.3 | My teacher asks for our feedback and reflects on how well our interactive hybrid classes are working. | ◯ | ◯ | ◯ | ◯ | ◯ |
| 1.4 | My teacher shows that they are continuously learning new ways to use technology in our classes. | ◯ | ◯ | ◯ | ◯ | ◯ |

**Part 2: Digital Resources**

| **No.** | **Statement** | **1** | **2** | **3** | **4** | **5** |
| --- | --- | --- | --- | --- | --- | --- |
| 2.1 | My teacher chooses good digital resources, websites, and apps for our learning. | ◯ | ◯ | ◯ | ◯ | ◯ |
| 2.2 | My teacher creates or customizes digital learning materials to make them easier for us to understand. | ◯ | ◯ | ◯ | ◯ | ◯ |
| 2.3 | My teacher organizes and shares digital learning materials so they are easy for us to find and use safely. | ◯ | ◯ | ◯ | ◯ | ◯ |

**Part 3: Teaching and Learning**

| **No.** | **Statement** | **1** | **2** | **3** | **4** | **5** |
| --- | --- | --- | --- | --- | --- | --- |
| 3.1 | My teacher uses helpful digital tools and applications when teaching us. | ◯ | ◯ | ◯ | ◯ | ◯ |
| 3.2 | My teacher guides us clearly on how to use the right digital resources for our assignments. | ◯ | ◯ | ◯ | ◯ | ◯ |
| 3.3 | My teacher interacts and collaborates with us effectively during online or hybrid learning. | ◯ | ◯ | ◯ | ◯ | ◯ |
| 3.4 | My teacher adjusts digital learning activities to fit the different learning speeds and levels of students. | ◯ | ◯ | ◯ | ◯ | ◯ |

**Part 4: Empowering Students**

| **No.** | **Statement** | **1** | **2** | **3** | **4** | **5** |
| --- | --- | --- | --- | --- | --- | --- |
| 4.1 | My teacher makes sure everyone in the class has fair access to the digital resources we need. | ◯ | ◯ | ◯ | ◯ | ◯ |
| 4.2 | My teacher provides digital materials that fit my personal learning style and needs. | ◯ | ◯ | ◯ | ◯ | ◯ |
| 4.3 | My teacher actively keeps me engaged and interested during interactive hybrid classes. | ◯ | ◯ | ◯ | ◯ | ◯ |

**Part 5: Assessment**

| **No.** | **Statement** | **1** | **2** | **3** | **4** | **5** |
| --- | --- | --- | --- | --- | --- | --- |
| 5.1 | My teacher uses different types of digital tools to test what we have learned (e.g., online quizzes, digital projects). | ◯ | ◯ | ◯ | ◯ | ◯ |
| 5.2 | My teacher looks at our online work carefully to understand how well we are learning. | ◯ | ◯ | ◯ | ◯ | ◯ |
| 5.3 | My teacher uses online tools to give me helpful feedback on my work and to plan future lessons. | ◯ | ◯ | ◯ | ◯ | ◯ |

**Part 6: Facilitating Students' Digital Competence**

| **No.** | **Statement** | **1** | **2** | **3** | **4** | **5** |
| --- | --- | --- | --- | --- | --- | --- |
| 6.1 | My teacher helps us learn how to find reliable information online and understand digital media. | ◯ | ◯ | ◯ | ◯ | ◯ |
| 6.2 | My teacher helps us learn how to communicate respectfully and effectively online. | ◯ | ◯ | ◯ | ◯ | ◯ |
| 6.3 | My teacher encourages us to create our own digital content (like videos, presentations, or blogs) for class. | ◯ | ◯ | ◯ | ◯ | ◯ |
| 6.4 | My teacher teaches us how to use digital resources responsibly, safely, and ethically. | ◯ | ◯ | ◯ | ◯ | ◯ |
| 6.5 | My teacher encourages us to use digital tools to figure things out and solve problems. | ◯ | ◯ | ◯ | ◯ | ◯ |

Thank you

**APPENDIX D LIST OF QUESTIONS**

**Part A: One-on-One Interview Questions**

*These questions are designed to prompt individual teachers to reflect on their personal practices and share specific examples.*

**1. Professional Engagement**

- Can you walk me through a recent example of how you collaborated with colleagues or ICT staff to improve a digital lesson?
- How do you typically reflect on your interactive hybrid teaching, and how has that reflection changed your practice?

**2. Digital Resources**

- When you are preparing for a new topic, what is your process for selecting, creating, or modifying digital resources?
- How do you ensure the digital materials you share with students are secure, organized, and respect privacy guidelines?

**3. Teaching and Learning**

- How do you decide which digital applications will best facilitate collaboration among your students during a hybrid lesson?
- Can you share a specific instance where you used technology to personalize learning for a student who was either struggling or advancing quickly?

**4. Empowering Students**

- The "digital divide" is a common challenge. How do you personally ensure that all your students have equal access to and can participate in your digital lessons?
- What specific strategies do you use to keep students actively engaged rather than passively watching a screen during hybrid learning?

**5. Assessment**

- Tell me about a digital assessment tool or strategy you use. How does the data or evidence you gather from it inform what you teach the next day or week?
- How has using digital tools changed the way you provide feedback to your students compared to traditional methods?

**6. Facilitating Students' Digital Competence**

- How do you intentionally teach your students to evaluate the credibility of the information they find online?
- Can you describe a time when a student faced a technical problem or a digital communication issue, and how you guided them to solve it responsibly?

**Part B: Focus Group Discussion (FGD) Questions**

*These questions are designed for a group of teachers to foster discussion, debate, and the sharing of best practices.*

**1. Professional Engagement**

- As a group, what do we find are the biggest barriers to continuously developing our digital pedagogic skills, and how can the school better support us?
- How effectively are we sharing our digital "wins" and "failures" with each other, and how could we improve this collaboration?

**2. Digital Resources**

- What are the most effective digital resources or platforms we are currently using across the school, and why do they work so well?
- Let's discuss the challenges of managing and sharing resources. Are we duplicating efforts, and how can we build a better shared repository?

**3. Teaching and Learning**

- In hybrid environments, keeping students collaborating with *each other* (not just the teacher) is tough. What strategies have you all found that actually work?
- How do we collectively manage the time it takes to create highly differentiated and personalized digital learning paths for our students?

**4. Empowering Students**

- When we look at our student body, where are we seeing the biggest gaps in digital accessibility or inclusion, and how can we address this systematically?
- What are the signs you look for to tell if a student is genuinely engaged in a hybrid lesson versus just "logged in," and how do we pull the disengaged ones back in?

**5. Assessment**

- Let's talk about academic integrity and authentic assessment in the digital age. How are we adapting our assessments to truly measure learning in a hybrid setup?
- Are we feeling overwhelmed by the amount of data digital assessment tools provide? How do we filter out the noise and use the data that actually matters?

**6. Facilitating Students' Digital Competence**

- Students are very comfortable *using* technology, but perhaps less comfortable using it *responsibly*. What behavioral or ethical issues are we seeing most often online, and how should we tackle them as a unified faculty?
- How can we shift our students from being mere consumers of digital content to active, responsible creators of it?

**Thank you**
